# Supplementary material
Source: publisher figshare collection journal article supplement (https://karger.figshare.com/ndownloader/files/17433953)
Supplement: Supplementary file 1 [file 17433953]

**Supplemental Table 2.** MRI sequences and parameters for the 3 Tesla MRI

| **Sequence** | **Slice orientation** | **TR (ms)** | **TE (ms)** | **Slice thickness (mm)/gap** | **Base/phase resolution** | **Flip angle** | **FOV** | **Acquisition time (min)** |
| --- | --- | --- | --- | --- | --- | --- | --- | --- |
| T2 TSE | Transverse | 8.000 | 160 | 2/10 % | 256/100% | 160 | 170 | 3:30 |
| T1 3D FLASH | Sagittal | 17 | 4.6 | 0.8/0 % | 256/100 | 13 | 200 | 5:06 |
| SWI | Transverse | 28 | 20 | 1.2/20 % | 384/80 | 15 | 180 | 3:32 |
| DWI | Transverse | 9.200 | 90 | 3/10 % | 192/100 |  | 170 | 2:56 |

TSE, turbo spin echo; FLASH, fast low-angle shot; SWI, susceptibility-weighted imaging; DWI, diffusion-weighted imaging; TR, repetition time; TE, echo time; FOV, field of view [16]
